# Supplementary material
Source: ML conference proceedings conference paper supplement (https://proceedings.neurips.cc/paper_files/paper/2012/hash/c78c347465f4775425c059ea101c131f-Abstract.html)
Supplement: Supplementary file 2 [file c78c347465f4775425c059ea101c131f-Supplemental.zip]

Archive with 1 entries (1 files):
- nips12_appendix.pdf
